# Supplementary material
Source: PubMed Central journal article supplement (PMC5792378)
Supplement: NIHMS896893-supplement-424_2017_2042_MOESM4_ESM.pdf [file NIHMS896893-supplement-424_2017_2042_MOESM4_ESM.pdf]

| Genotype            | Treatment | Body weight |
|---------------------|-----------|-------------|
| WT                  | Control   | 20,9        |
|                     |           | 21,7        |
|                     |           | 22          |
|                     |           | 22,7        |
|                     |           | 20,2        |
|                     |           | 17,1        |
|                     |           | 22,9        |
|                     |           | 20,4        |
|                     |           | 21,7        |
|                     |           | 23          |
| Pkd2 <sup>+/-</sup> | Control   | 23,9        |
|                     |           | 19,6        |
|                     |           | 22,2        |
|                     |           | 20,2        |
|                     |           | 24,1        |
|                     |           | 19,1        |
|                     |           | 20,9        |
|                     |           | 21          |
| WT                  | Stress    | 24,1        |
|                     |           | 19,9        |
|                     |           | 18,3        |
|                     |           | 19,1        |
|                     |           | 15,4        |
|                     |           | 22,4        |
|                     |           | 21,8        |
|                     |           | 26,4        |
|                     |           | 23,1        |
|                     |           | 25,5        |
| Pkd2 <sup>+/-</sup> | Stress    | 23,8        |
|                     |           | 25          |
|                     |           | 19,8        |
|                     |           | 22,4        |
|                     |           | 21,4        |
|                     |           | 25,1        |
|                     |           | 23          |
|                     |           | 23,1        |

Supplemental Table 1
