# Supplementary material
Source: PubMed Central journal article supplement (PMC5792378)

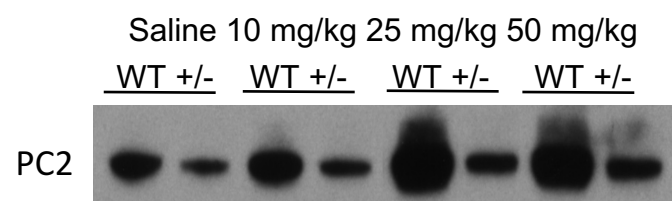

**Supplemental Fig. 1**

Supplement: NIHMS896893-supplement-424_2017_2042_MOESM1_ESM.pdf [file NIHMS896893-supplement-424_2017_2042_MOESM1_ESM.pdf]

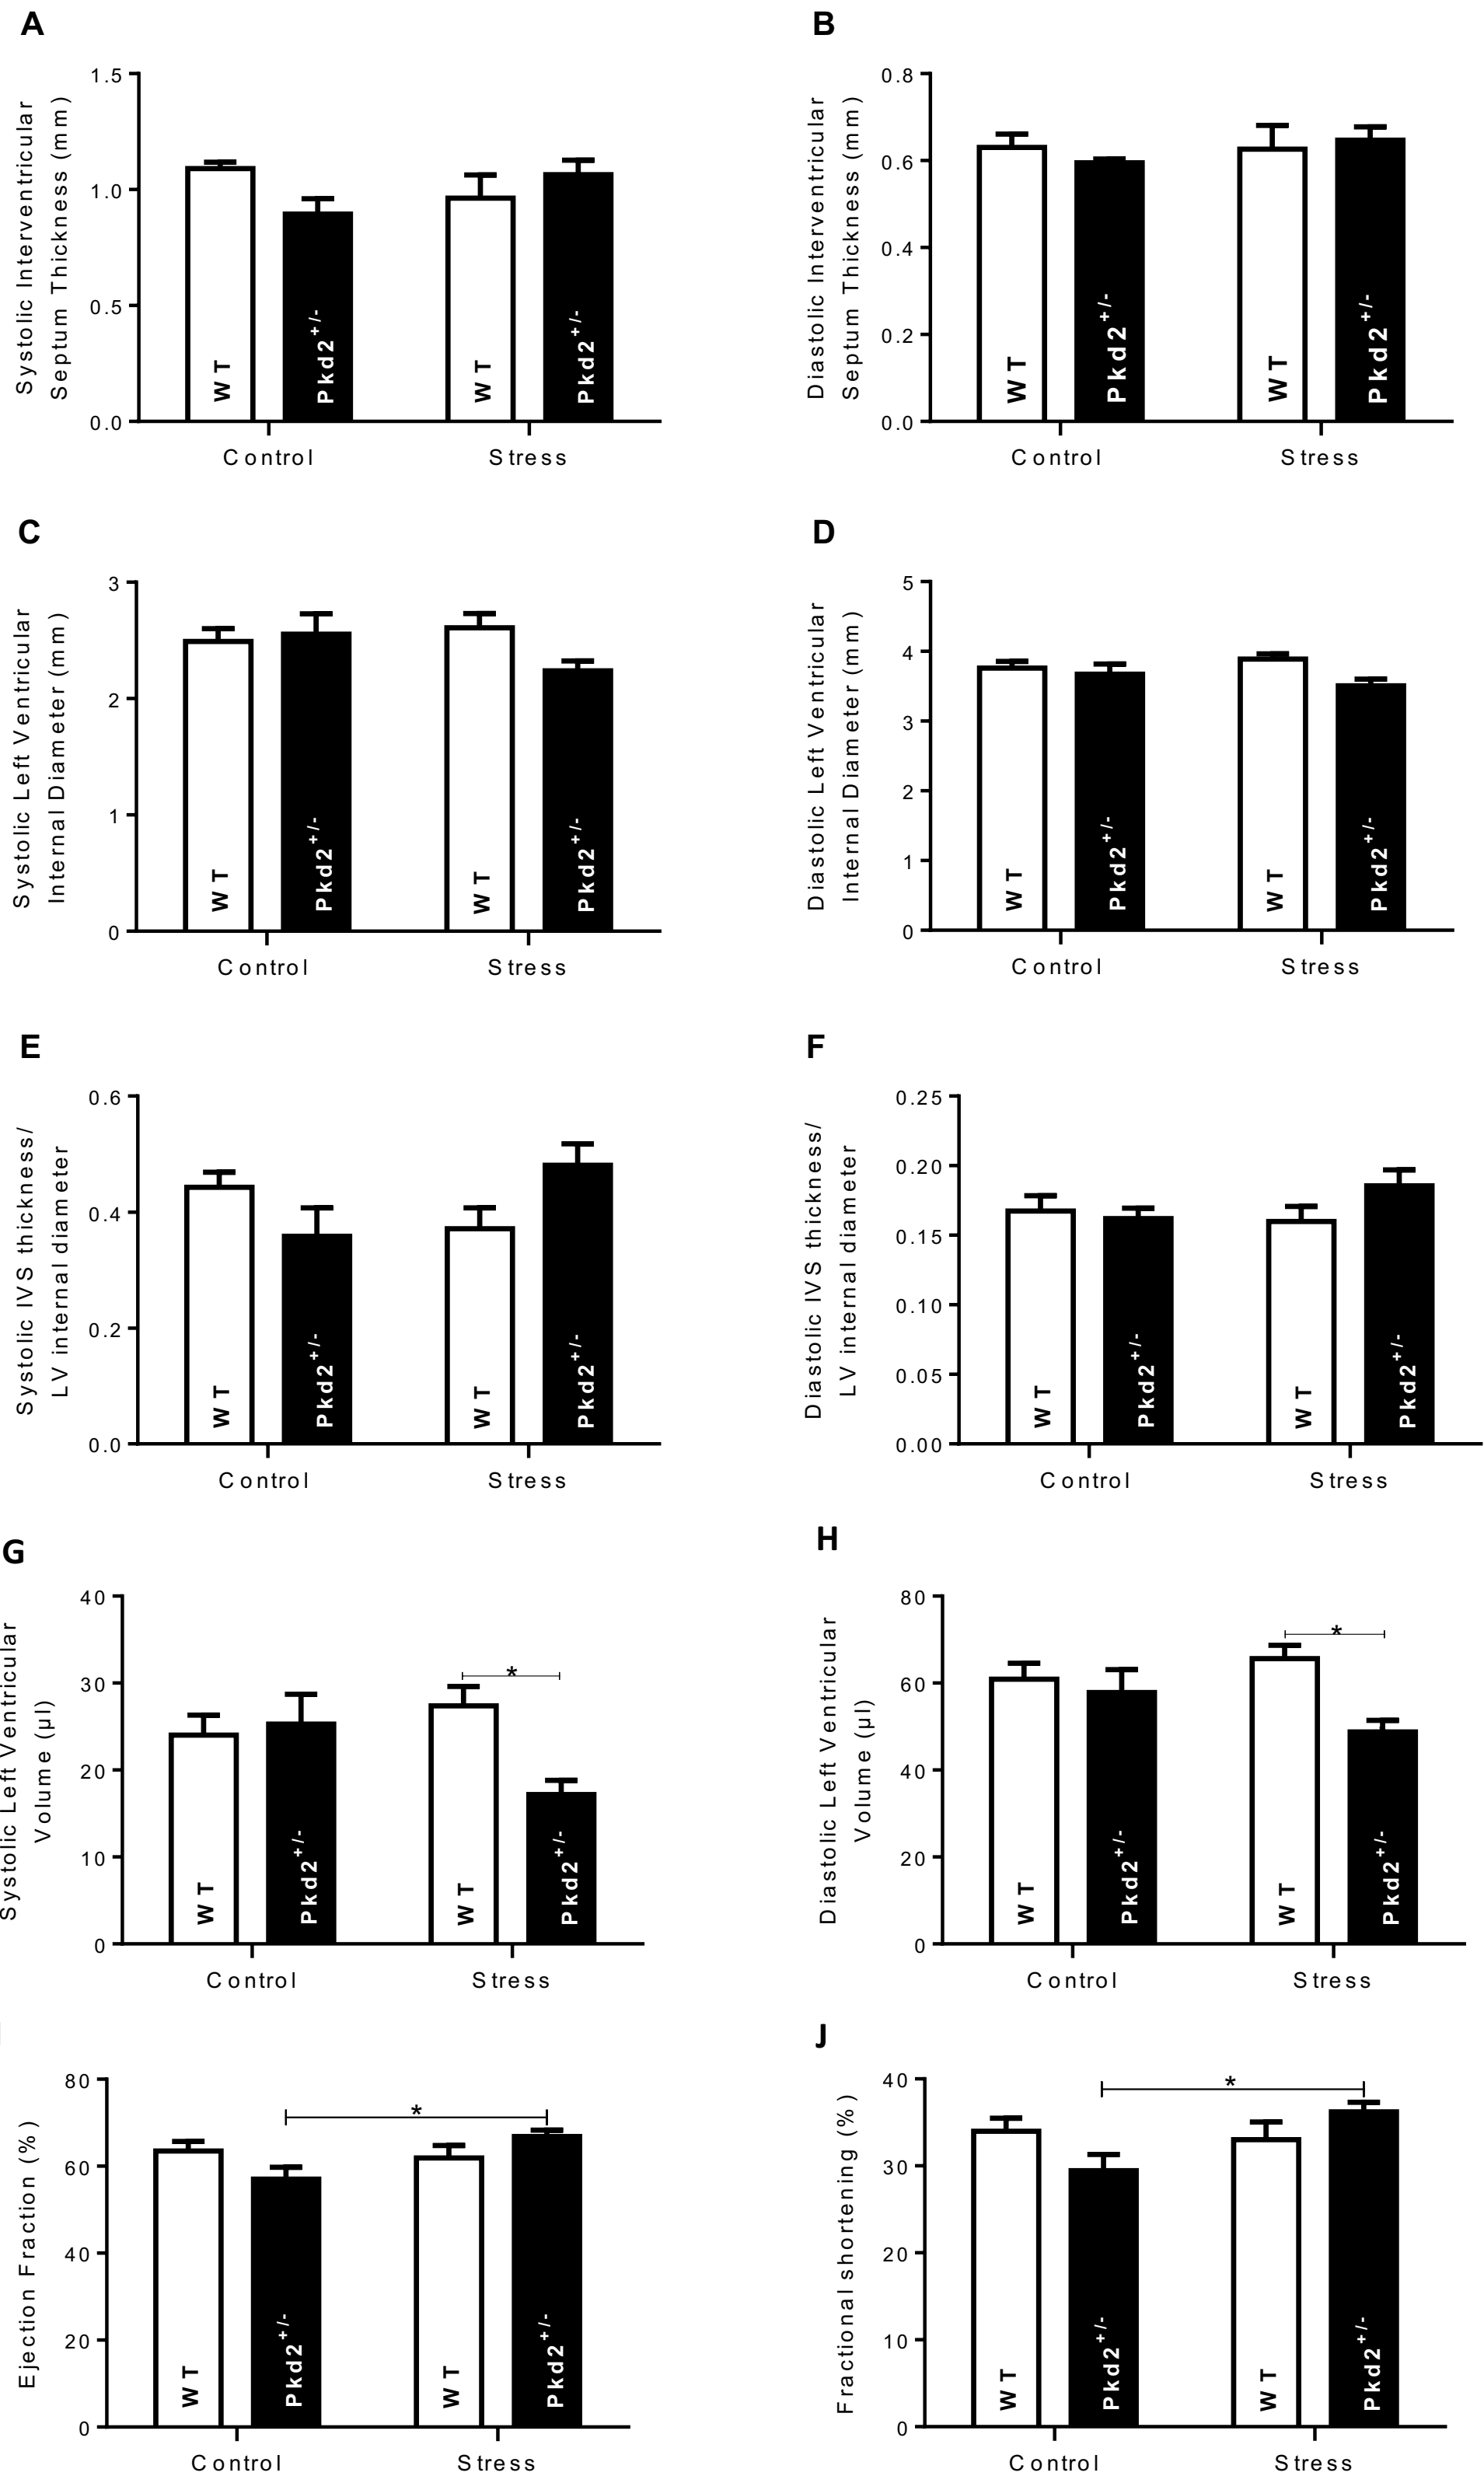

Supplemental Fig. 2

Supplement: NIHMS896893-supplement-424_2017_2042_MOESM2_ESM.pdf [file NIHMS896893-supplement-424_2017_2042_MOESM2_ESM.pdf]

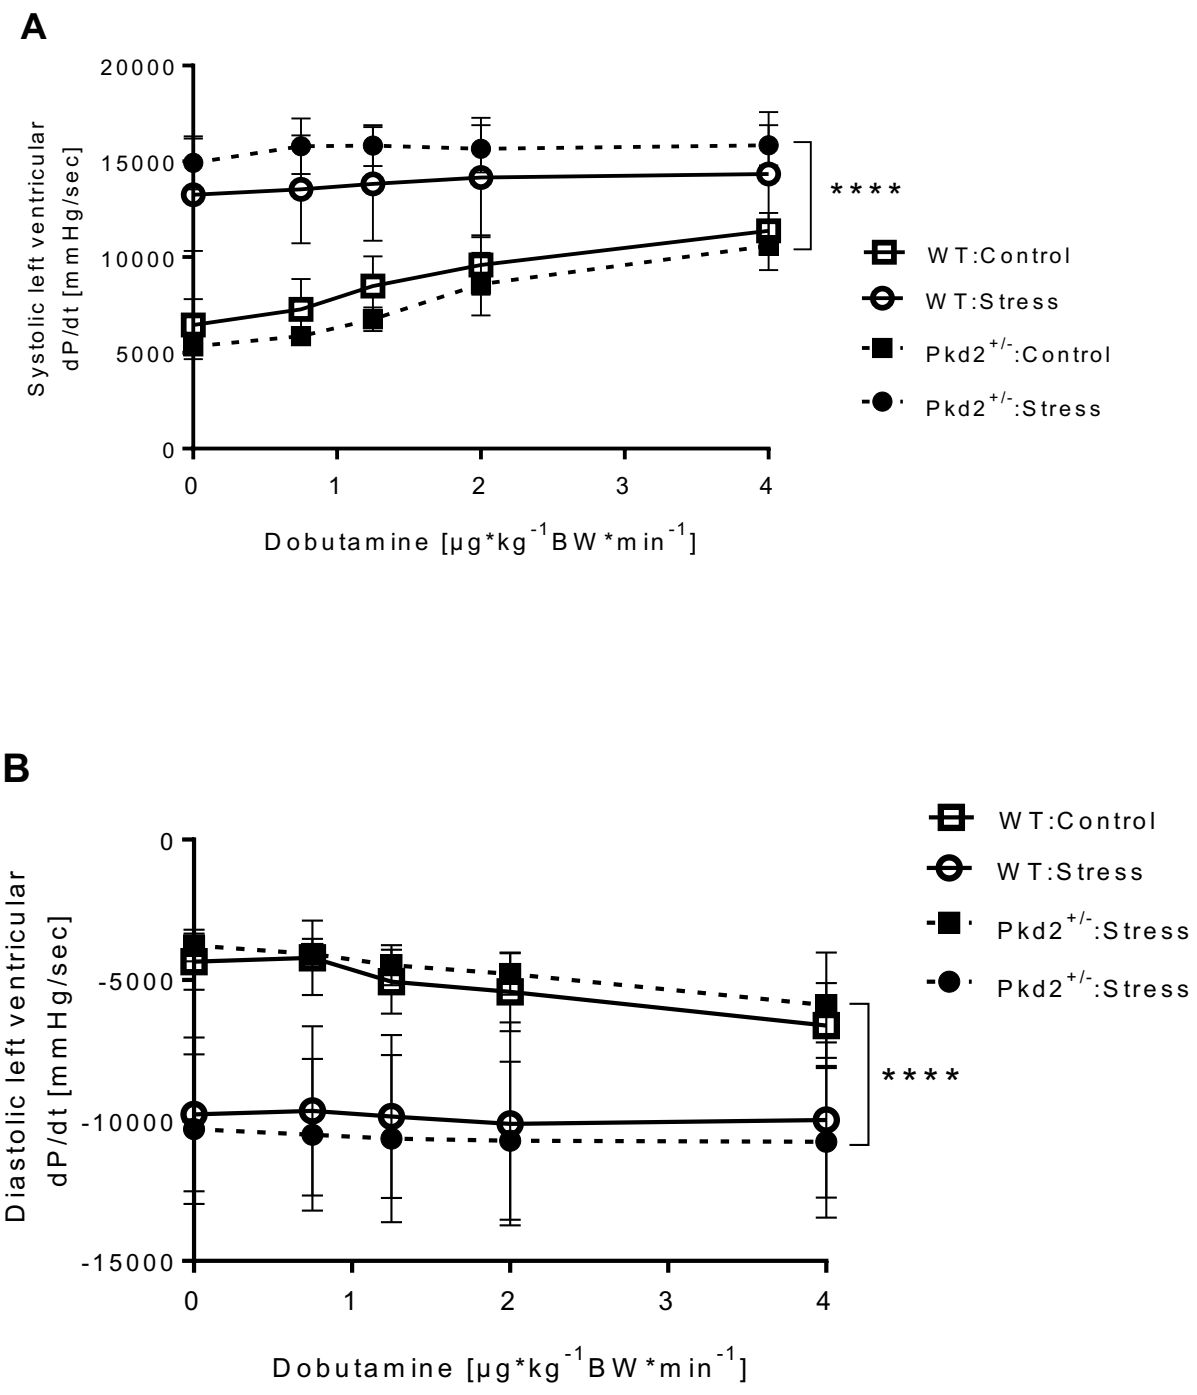

Supplemental Fig. 3

Supplement: NIHMS896893-supplement-424_2017_2042_MOESM3_ESM.pdf [file NIHMS896893-supplement-424_2017_2042_MOESM3_ESM.pdf]
